# Supplementary material for: A comparison of RNA-seq and exon arrays for whole genome transcription profiling of the L5 spinal nerve transection model of neuropathic pain in the rat
Source: PubMed Central journal article supplement (PMC4021616; doi:10.1186/1744-8069-10-7), 2014-01-28

**Ai**

Depth: 50M, Probes: extended

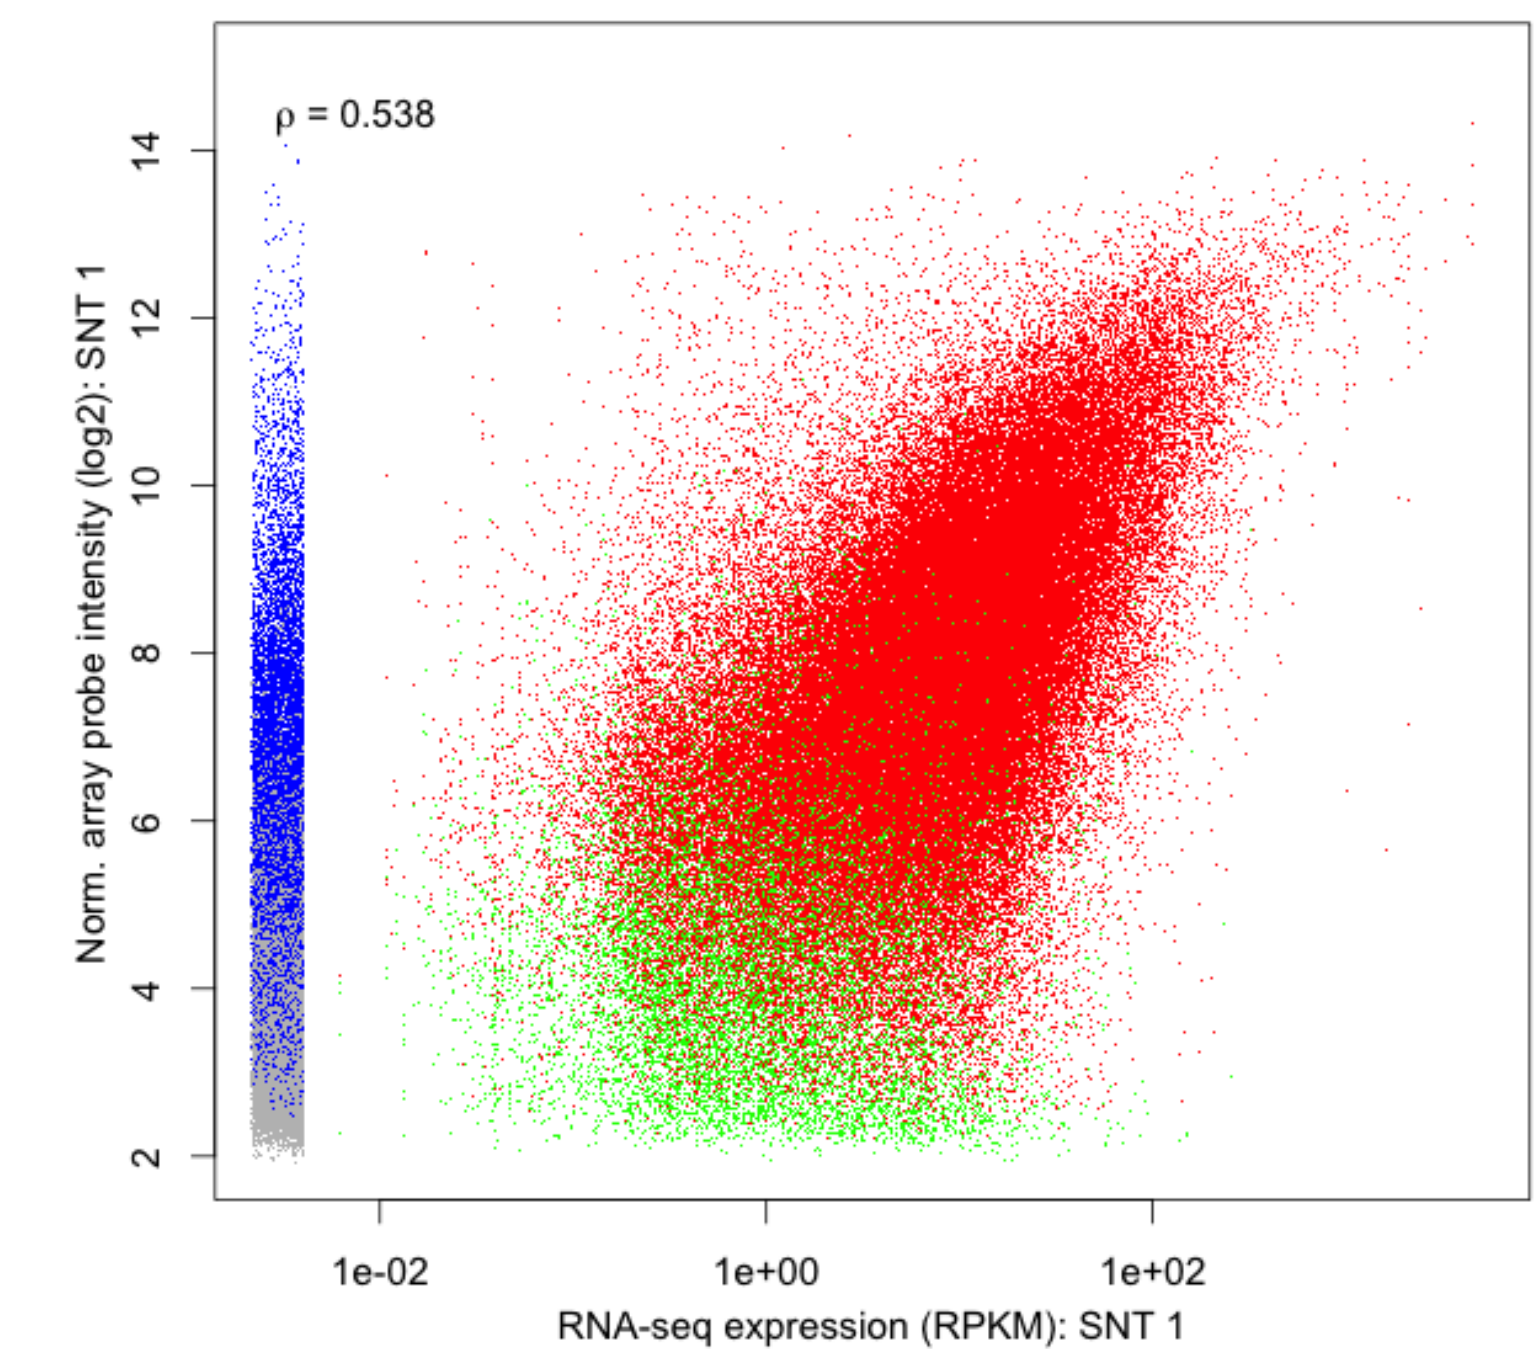**Aii**

Depth: 50M, Probes: extended

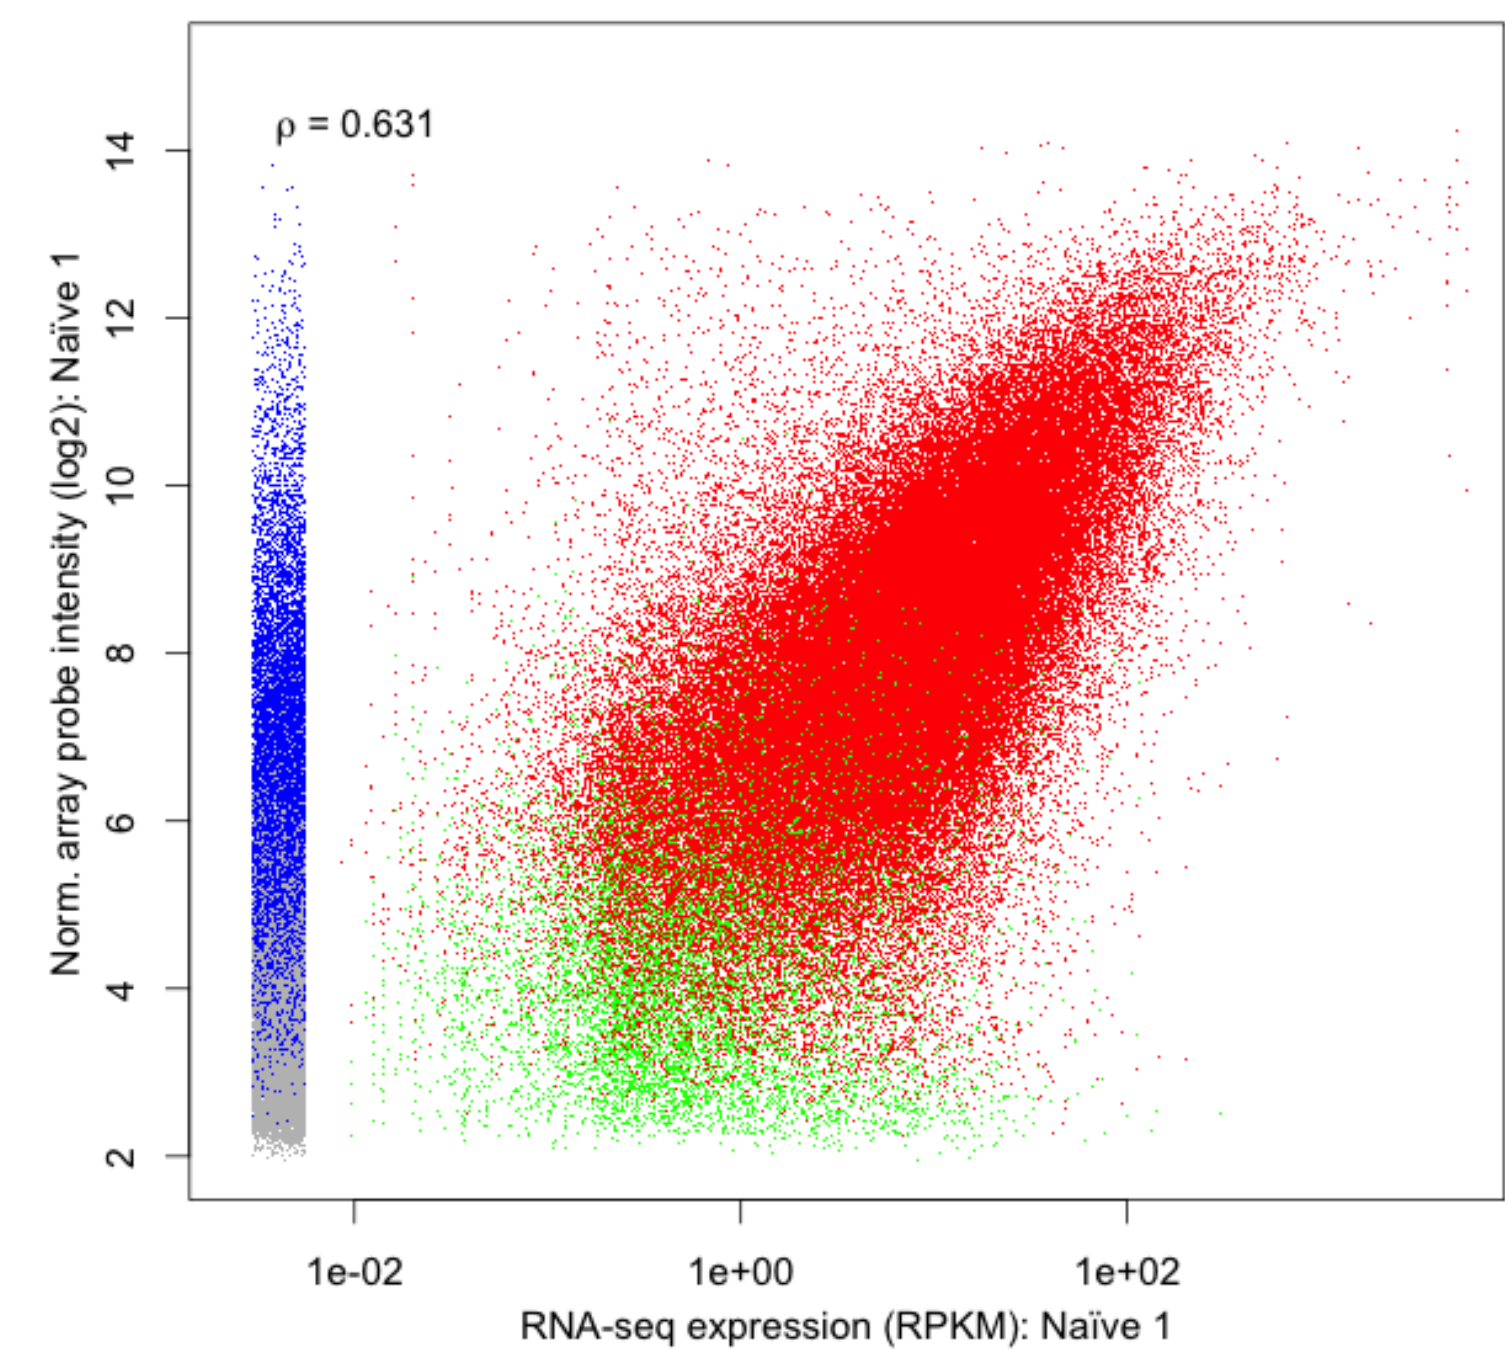

- Not detected in either platform
- Detected in RNA-seq, signal below noise in microarrays
- Detected by both platforms
- Detected by microarrays only

**B**

Depth: 50M, Probes: extd

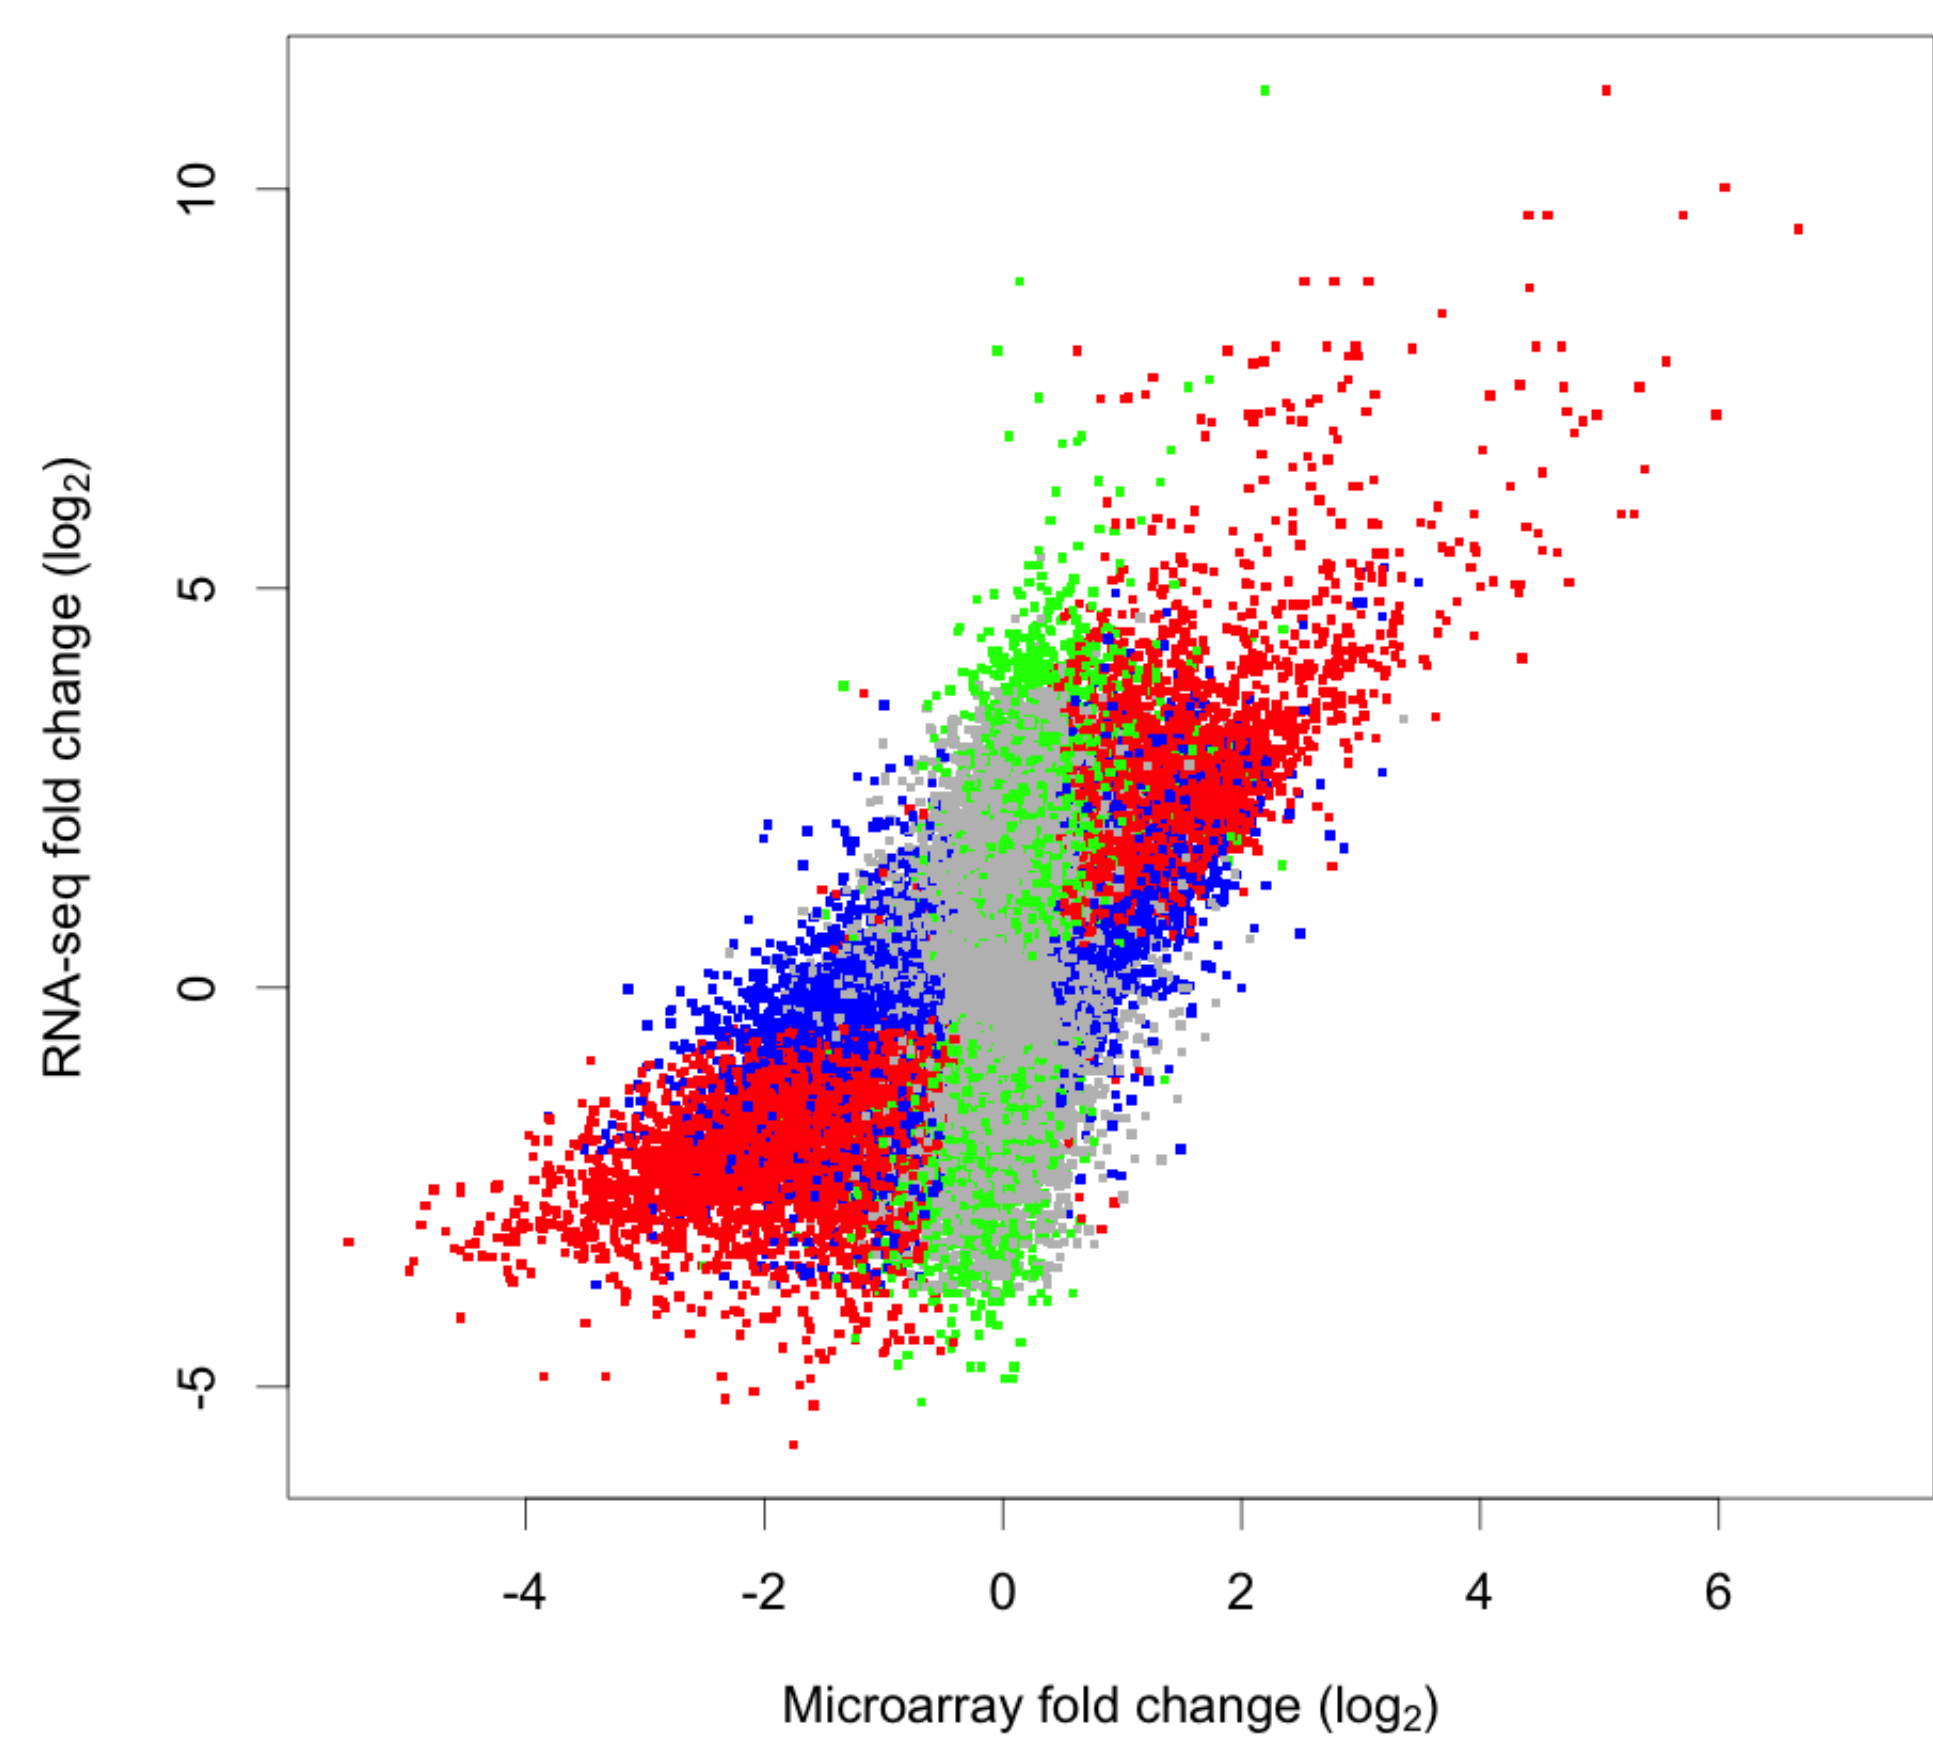

- Sig. DE in both
- Sig. DE in RNA-seq only
- Sig. DE in microarrays only
- Not sig. DE for either platform

**C**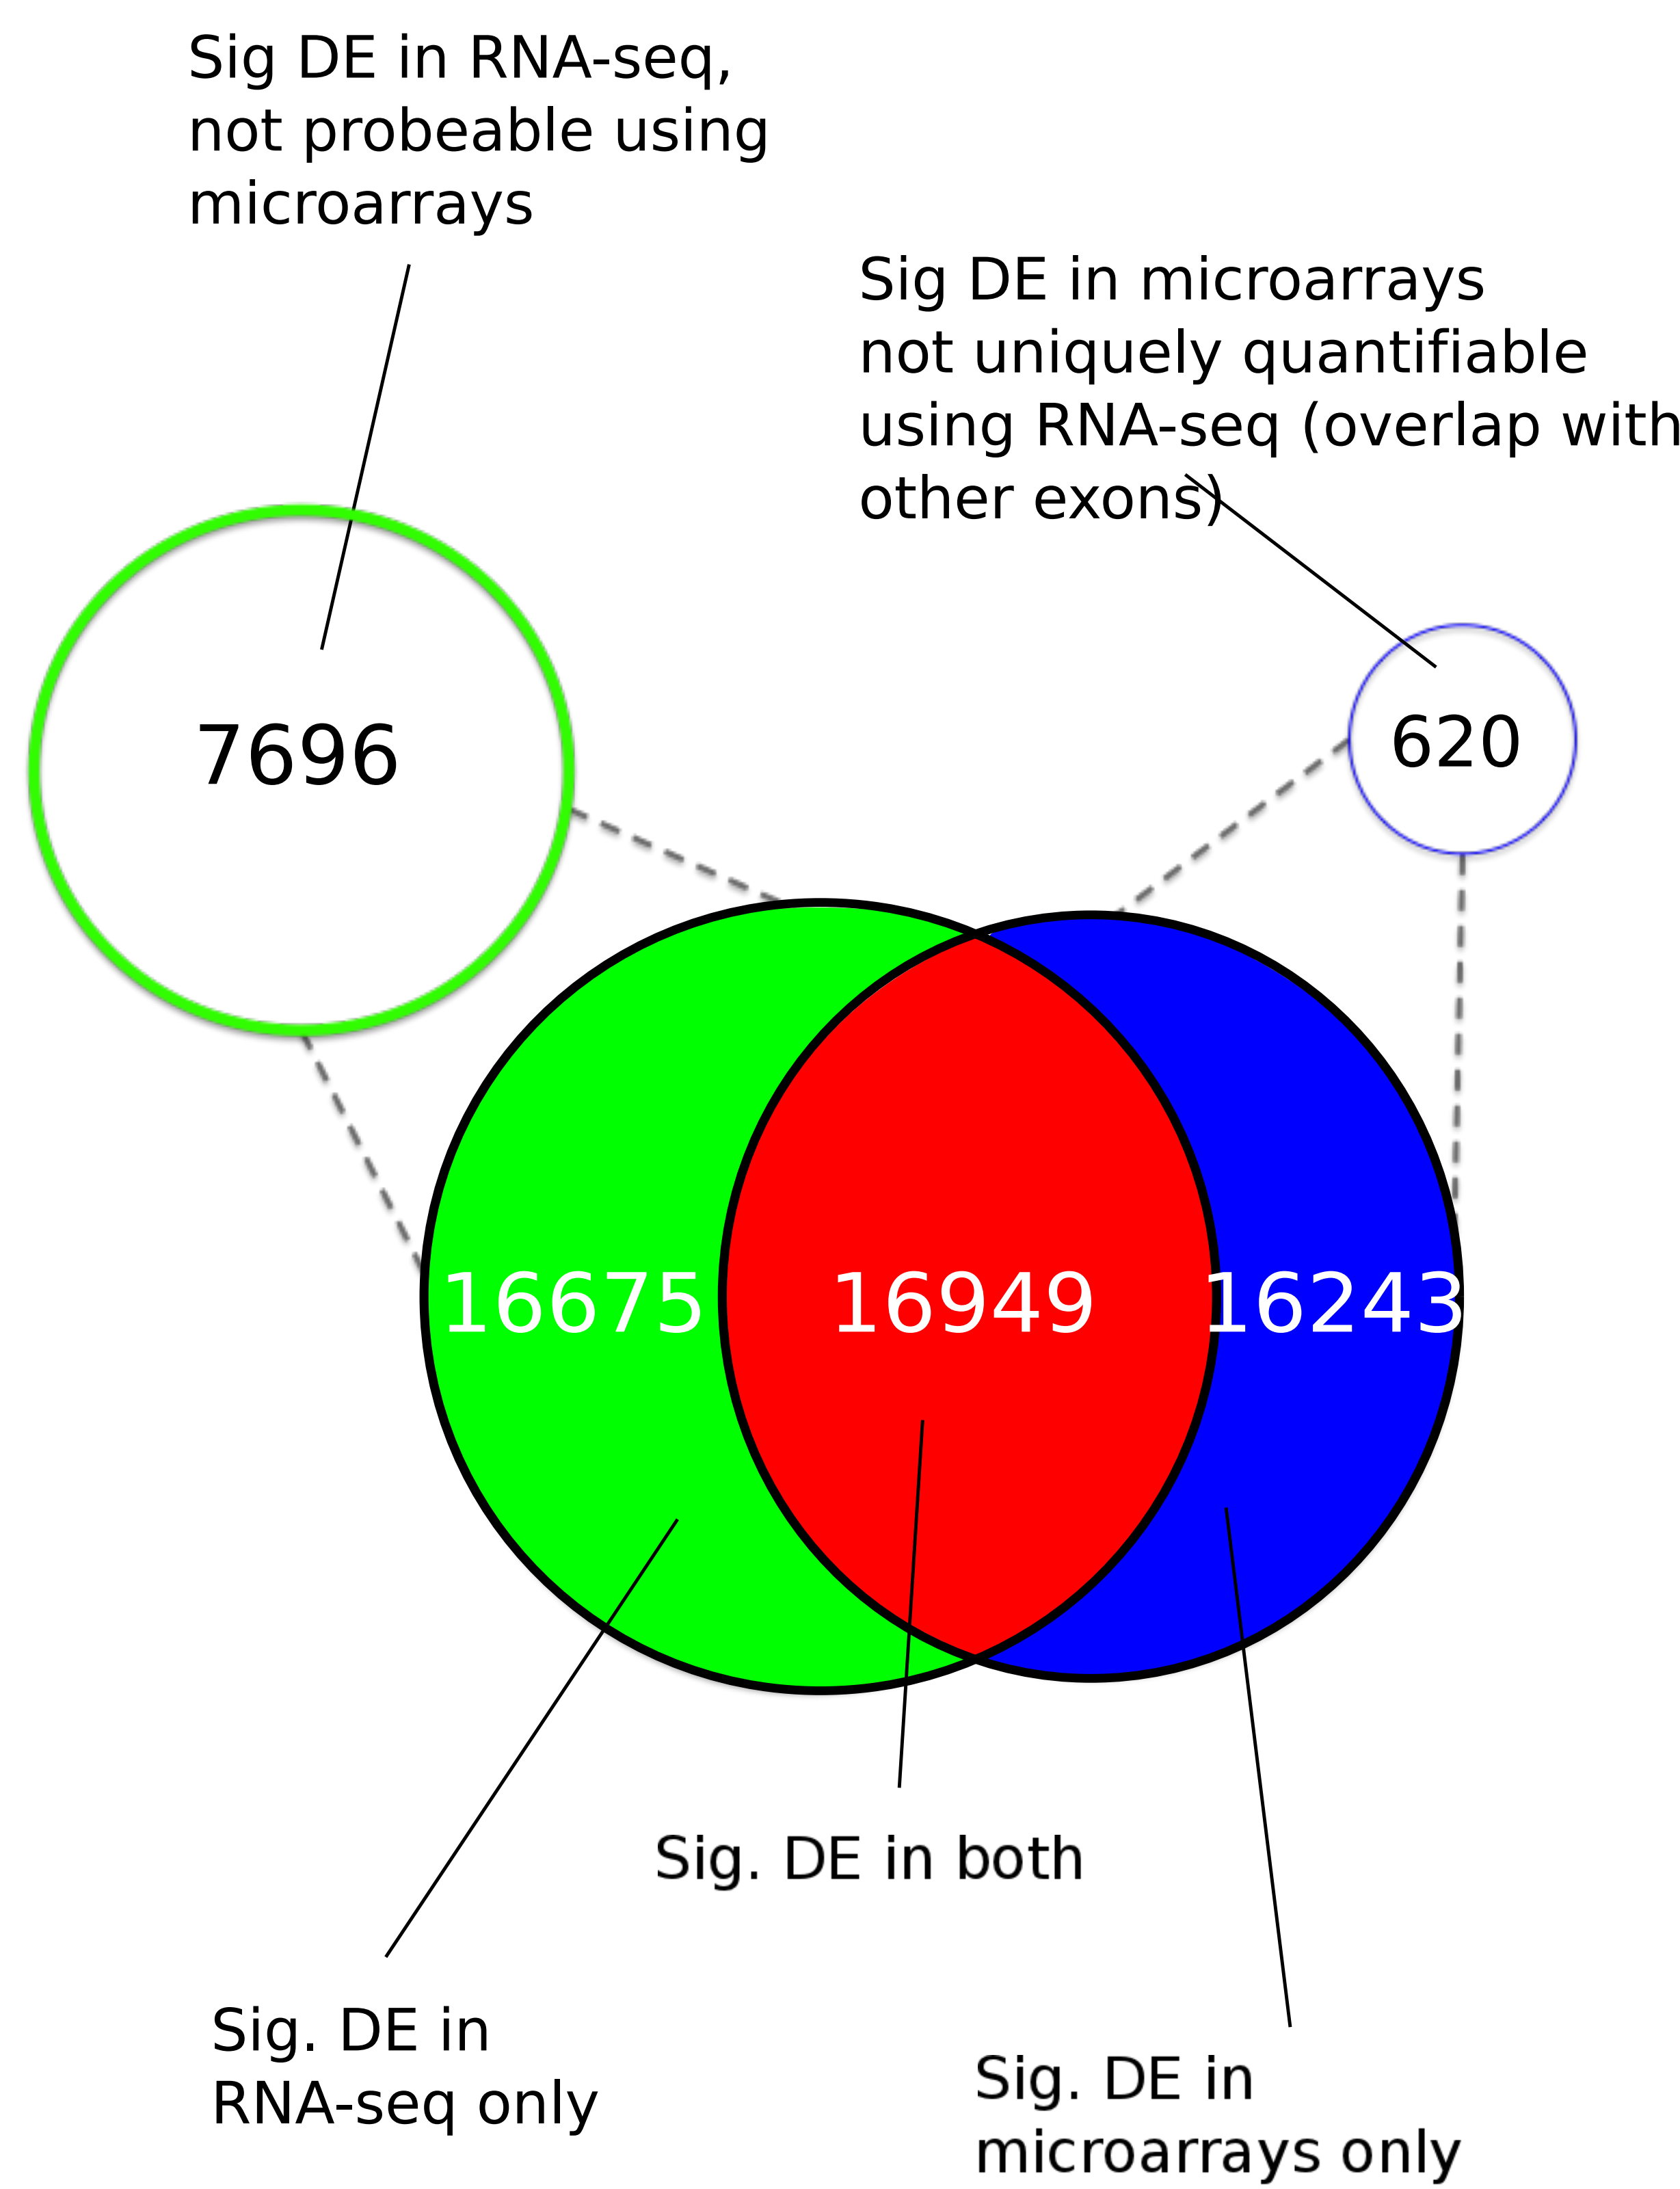

Supplement: 1744-8069-10-7-S3.pdf [file 1744-8069-10-7-S3.pdf]
