# Supplementary material for: A comparison of RNA-seq and exon arrays for whole genome transcription profiling of the L5 spinal nerve transection model of neuropathic pain in the rat
Source: PubMed Central journal article supplement (PMC4021616; doi:10.1186/1744-8069-10-7), 2014-01-28

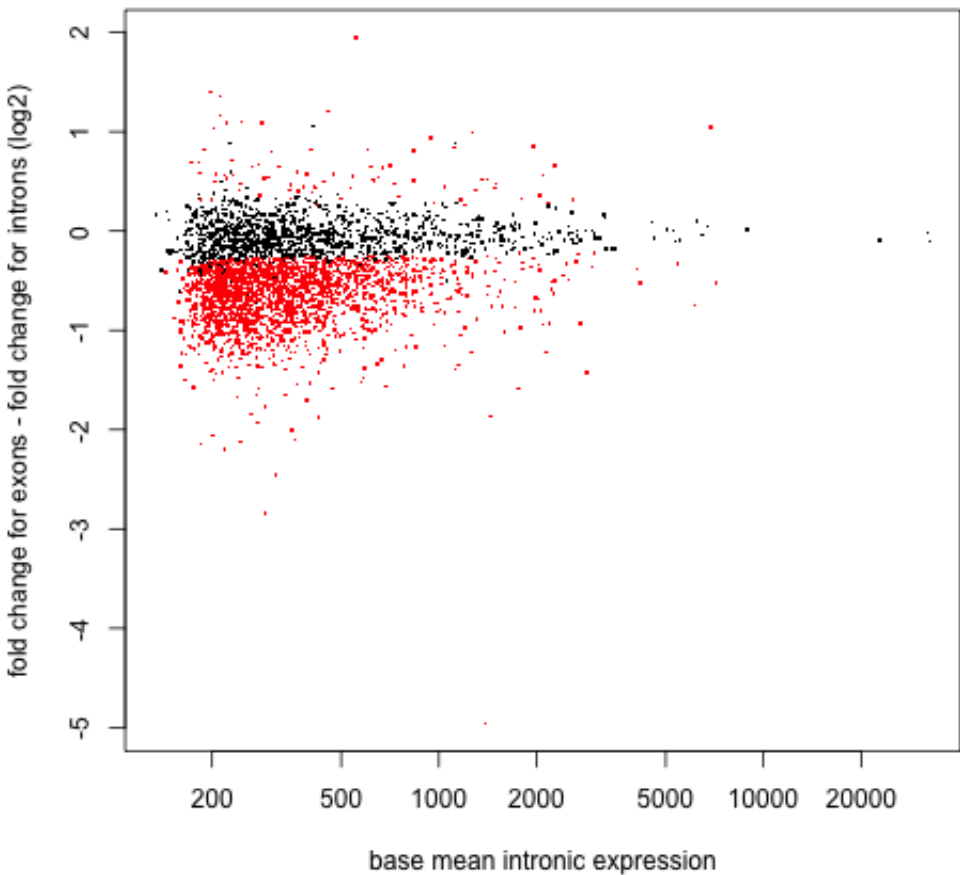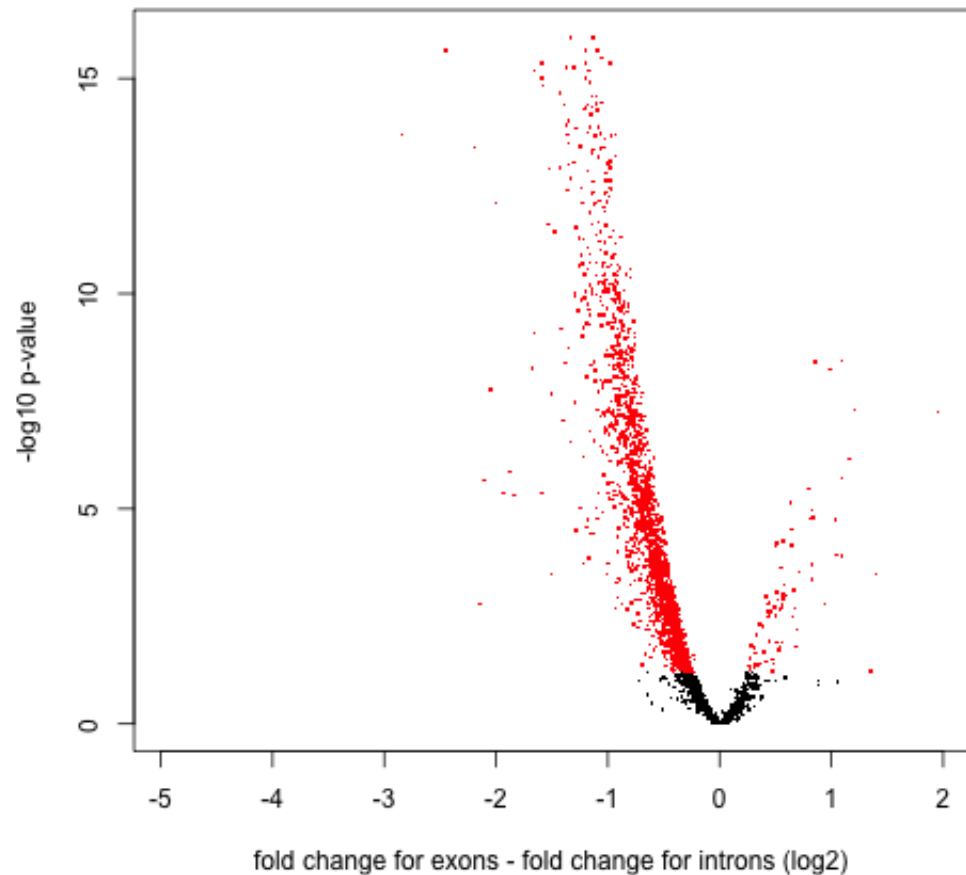

Supplement: 1744-8069-10-7-S6.pdf [file 1744-8069-10-7-S6.pdf]
